# Supplementary material
Source: PubMed Central journal article supplement (PMC6668516)
Supplement: Supplemental_Table_S1.pdf [file Supplemental_Table_S1.pdf]

## Supplemental Materials

**Supplemental Table S1:** The ratio of ipsilateral and contralateral T2-weighted signal intensities in the hippocampus, cortex, and external capsule from the severe edema, mild edema, and sham groups, at 3 and 24 hours after injury. Data are presented as group mean  $\pm$  inter-subject standard deviation. \*  $p < 0.05$  and \*\* $p < 0.01$  compared to the sham group by t-test.

| Ipsilateral-to-contralateral ratio | Hippocampus      |                  | Cortex           |                   | External Capsule |                   |
|------------------------------------|------------------|------------------|------------------|-------------------|------------------|-------------------|
|                                    | 3hrs             | 24hrs            | 3hrs             | 24hrs             | 3hrs             | 24hrs             |
| Severe (n = 5)                     | 1.17 $\pm$ 0.12* | 1.31 $\pm$ 0.25* | 1.27 $\pm$ 0.39* | 1.46 $\pm$ 0.30*  | 0.91 $\pm$ 0.09  | 1.04 $\pm$ 0.28   |
| Mild (n = 12)                      | 1.04 $\pm$ 0.05  | 0.96 $\pm$ 0.06  | 1.02 $\pm$ 0.07  | 1.11 $\pm$ 0.10** | 1.00 $\pm$ 0.06  | 1.12 $\pm$ 0.08** |
| Sham (n = 9)                       | 1.01 $\pm$ 0.05  | 0.99 $\pm$ 0.06  | 1.01 $\pm$ 0.08  | 1.00 $\pm$ 0.06   | 1.01 $\pm$ 0.05  | 0.99 $\pm$ 0.06   |
